# Supplementary material for: Cas4 Facilitates PAM-Compatible Spacer Selection during CRISPR Adaptation
Source: PubMed Central journal article supplement — Cell Rep. 2018 Mar 27;22(13):3377–84. doi: 10.1016/j.celrep.2018.02.103 (PMC5896167; doi:10.1016/j.celrep.2018.02.103), 2018-03-27
Supplement: mmc1.pdf [file mmc1.pdf]

**Cell Reports, Volume 22**

## **Supplemental Information**

### **Cas4 Facilitates PAM-Compatible Spacer**

#### **Selection during CRISPR Adaptation**

**Sebastian N. Kieper, Cristóbal Almendros, Juliane Behler, Rebecca E. McKenzie, Franklin L. Nobrega, Anna C. Haagsma, Jochem N.A. Vink, Wolfgang R. Hess, and Stan J.J. Brouns**

## Supplemental figures

### Figure S1. High sensitivity spacer detection PCR, Related to Figure 1 D

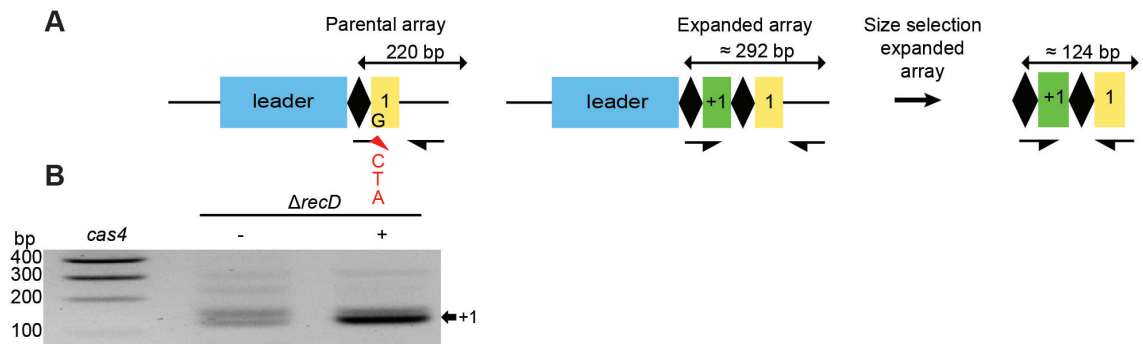

**Figure S1 A.** Following the first round of amplification, the hypothetical amplicon of expanded arrays of ~292 bp (not visible on gel in **Fig. 1D**) is size selected using the BluePippin system (3% agarose cassette, SageScience). The extracted band is then subjected to a second PCR using the same forward degenerate primer mix (Heler et al. 2015) with a reverse primer annealing in spacer1 of the parental array. **B** By applying the PCR approach described in **A** spacer integration is observed in the *E. coli* K12  $\Delta recD$  background in the presence or absence of *cas4*. Band intensity is not a quantitative measure for integration efficiency, but rather a binary result (yes/no), because PCR product input resulting from automatized size selection cannot be normalized. The amplicon corresponding to expanded arrays is indicated with a black arrow.

**Figure S2. PAM and size distribution of new spacers, Related to Figure 2.**

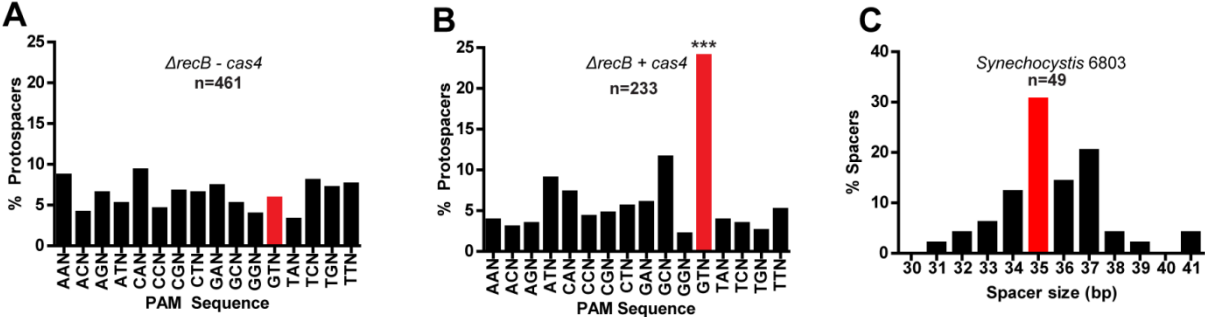

**Figure S2, A** Percentage of protospacers adjacent to indicated PAM matched by spacers acquired in **A** *ΔrecB* without *cas4* and **B** with *cas4*. **C** Spacer size distribution in the native type I-D host *Synechocystis*. n= number of analyzed spacers, significance level  $\alpha = 0.001$ .

**Figure S3. Genomic spacer mapping, Related to Figure 2.**

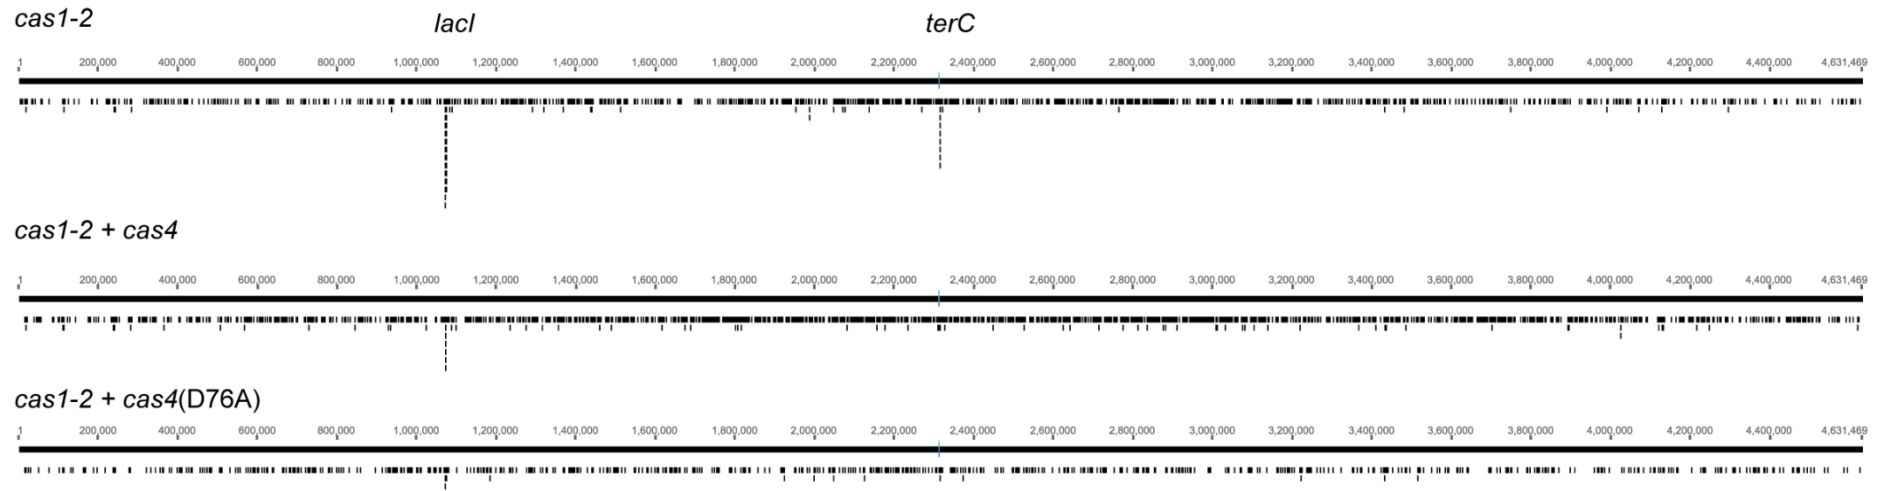

**Figure S3.** Origin of spacers acquired from the WT *E. coli* K12 genome. In the absence of *cas4* the Cas1-2 integration complex acquires spacers with preference for the *lacI* sequence and *terC* site. The preferential uptake of spacers derived from the *terC* site is lost when supplying Cas4 WT or Cas4<sup>D76A</sup>.

## Supplementary Tables

**Table S1. Plasmids used in this study, Related to Figure 1, 2, 3.**

| Name in this study    | Name   | Insert                                                 | Vector     | Resistance | Source                 |
|-----------------------|--------|--------------------------------------------------------|------------|------------|------------------------|
| pCas2                 | pTU084 | Synechocystis PCC6803 Type I-D <i>cas2</i> (deltaCas1) | pET-T7     | Amp        | This study             |
| pCas1                 | pTU085 | Synechocystis PCC6803 Type I-D <i>cas1</i> (deltaCas2) | pET-T7     | Amp        | This study             |
| pCas4 <sup>D76A</sup> | pTU086 | Synechocystis PCC6803 Type I-D <i>cas4</i> (D76A)      | pET-T7     | Spec       | This study             |
| pCas4                 | pTU130 | Synechocystis PCC6803 Type I-D <i>cas4</i>             | pET-T7     | Spec       | This study             |
| pCRISPR               | pTU134 | Synechocystis PCC6803 Type I-D Leader-R-S1             | pACYCDuet1 | Cm         | This study             |
| pCas1-2               | pTU70  | Synechocystis PCC6803 Type I-D <i>cas1-cas2</i>        | pET-T7     | Amp        | This study             |
| pEmp                  | pTU116 | NA                                                     | pET-T7     | Spec       | Addgene Plasmid #48329 |
| pVZ322                | pNT    | NA                                                     | pVZ322     | Gent       | This study             |
| pVZ322 pT-GTA         | pT-GTA | GTA-protospacer1-GentR                                 | pVZ322     | Gent       | This study             |
| pVZ322 pT-GTT         | pT-GTT | GTT-protospacer1-GentR                                 | pVZ322     | Gent       | This study             |
| pVZ322 pT-GTC         | pT-GTC | GTC-protospacer1-GentR                                 | pVZ322     | Gent       | This study             |
| pVZ322 pT-GTG         | pT-GTG | GTG-protospacer1-GentR                                 | pVZ322     | Gent       | This study             |

**Table S2. Oligonucleotides used in this study, Related to Figure 1, 2, 3.**

| Name                   | Sequence                                                                | Description                                                 |
|------------------------|-------------------------------------------------------------------------|-------------------------------------------------------------|
| BG7615                 | TTATGGAGTTGGGATCTTATTAGATAATAAT<br>ACTACCAGGTTTTCTGGTTG                 | <i>cas2</i> rv                                              |
| BG8223                 | TACTTCCAATCCAATGCAATGGATGATTATT<br>TACCTTTAGC                           | <i>cas4</i> fw                                              |
| BG8224                 | TTATCCACTTCCAATGTTATTATTTAGTAAGT<br>TTTTTTAATTCTTTCGG                   | <i>cas4</i> rv                                              |
| BN015                  | CGTCCATGGGAAGTCATTCTTCAAATTTTGG<br>C                                    | leader fw                                                   |
| BN016                  | TACAAGCTTAGGCATTGAAAGCGACC                                              | Sp1 Rv (for degenerate<br>PCR)                              |
| BN114                  | TTTAAGAAGGAGATATAGATCATGTCTACAC<br>TTTACTTGAICTCAACC                    | <i>cas1</i> fw                                              |
| BN135                  | GCTGCAGTGGAAAGAAAGTG                                                    | Type I-D <i>cas4</i><br>mutagenesis D76A Fw                 |
| BN136                  | AATAATCCCTTTAACTTTTAGGCG                                                | Type I-D <i>cas4</i><br>mutagenesis D76A Rv                 |
| BN143                  | GCGATCGGGACTGAAACT                                                      | Degenerated Fw1                                             |
| BN144                  | GCGATCGGGACTGAAACA                                                      | Degenerated Fw2                                             |
| BN145                  | GCGATCGGGACTGAAACC                                                      | Degenerated Fw3                                             |
| BN156                  | AGGCATTGAAAGCGACC                                                       | Degenerate PCR Rv<br>(internal. Sp1)                        |
| BN172                  | AGATCTGCCATATGTATATCTCCTTC                                              | pAcyc backbone Rv (for<br>degenerate PCR)                   |
| BN212                  | GATCTATATCTCCTTCTTAAAGTTAAAC                                            | <i>cas1</i> deletion Rv                                     |
| BN213                  | CAGTTATCAGTTGTGTTTTGAC                                                  | <i>cas1</i> deletion Fw                                     |
| BN214                  | TTTTTAGTCGTCAAACACAAC                                                   | <i>cas2</i> deletion Rv                                     |
| BN215                  | TAATAAGATCCCAACTCCATAAG                                                 | <i>cas2</i> deletion Fw                                     |
| GentaR_pUC<br>19_fwd   | CGGTGATGACGGTGAGATTCCATTTTTACAC<br>TGATGAATGTTCCGTTGCG                  | Gentamicin resistance<br>cassette with overlaps to<br>pUC19 |
| GentaR_pUC<br>19_rev   | CGCCTTTGAGTGAGCTCCCGGCATTCGCTG<br>CGCT                                  | Gentamicin resistance<br>cassette with overlaps to<br>pUC19 |
| CRISPR1_G<br>TG_S1_fwd | GTGGATTGTTGTGCCCTGGCGGTGCGTTT<br>CAATGCCTTTAAACAATTCGTTCAAGCCGAGA<br>TC | GTG PAM motif spacer 1                                      |
| CRISPR1_G<br>TG_S1_rev | AAGGCATTGAAAGCGACCGCCAGGGGCAC<br>AACAACTCACGGTGGCGGTAICTTGGGTG          | GTG PAM motif spacer 1                                      |
| CRISPR1_G<br>TA_S1_fwd | GTAGATTGTTGTGCCCTGGCGGTGCGTTT<br>CAATGCCTTTAAACAATTCGTTCAAGCCGAGA<br>TC | GTA PAM motif spacer 1                                      |
| CRISPR1_G<br>TA_S1_rev | AAGGCATTGAAAGCGACCGCCAGGGGCAC<br>AACAACTACGGTGGCGGTAICTTGGGTG           | GTA PAM motif spacer 1                                      |
| CRISPR1_G<br>TT_S1_fwd | GTTGATTGTTGTGCCCTGGCGGTGCGTTT<br>CAATGCCTTTAAACAATTCGTTCAAGCCGAGA<br>TC | GTT PAM motif spacer 1                                      |
| CRISPR1_G<br>TT_S1_rev | AAGGCATTGAAAGCGACCGCCAGGGGCAC<br>AACAACTAACGGTGGCGGTAICTTGGGTG          | GTT PAM motif spacer 1                                      |
| CRISPR1_G<br>TC_S1_fwd | GTGATTGTTGTGCCCTGGCGGTGCGTTT<br>CAATGCCTTTAAACAATTCGTTCAAGCCGAGA<br>TC  | GTC PAM motif spacer 1                                      |
| CRISPR1_G<br>TC_S1_rev | AAGGCATTGAAAGCGACCGCCAGGGGCAC<br>AACAACTGACGGTGGCGGTAICTTGGGTG          | GTC PAM motif spacer 1                                      |

|                        |                                                                         |                                                              |
|------------------------|-------------------------------------------------------------------------|--------------------------------------------------------------|
| CRISPR1_A<br>GC_S1_fwd | AGCGATTGTTGTGCCCTGGCGGTCGCTTT<br>CAATGCCTTTAACAAATTCGTTCAAGCCGAGA<br>TC | AGC mock-PAM motif<br>spacer 1                               |
| CRISPR1_A<br>GC_S1_rev | AAGGCATTGAAAGCGACCGCCAGGGGCAC<br>AACAAATCGCTGGTGGCGGTACTTGGGTC          | AGC mock-PAM motif<br>spacer 1                               |
| GentaR_pVZ<br>322_fwd  | TCTGCTCCTGCAGGTCGACTGATTCCATTTT<br>TACTGATGAATGTTCCGTTGCGCTGCC          | Gentamicin resistance<br>cassette with overlaps to<br>pVZ322 |
| GentaR_pVZ<br>322_rev  | CCCGGCATTCGCTGCGCTTATGGCAGAGCA                                          | Gentamicin resistance<br>cassette with overlaps to<br>pVZ322 |

**Table S3. Spacer origin analysis of unique spacers, Related to Figure 2**

| Strain        | Cas4 | Genome |     | pCas4/pEmp |     | pCas1-2 |    | pCRISPR |    | % Protospacers |      | % Protospacers with GTN PAM |
|---------------|------|--------|-----|------------|-----|---------|----|---------|----|----------------|------|-----------------------------|
|               |      | Fw     | Rv  | Fw         | Rv  | Fw      | Rv | Fw      | Rv | G              | P    |                             |
| WT            | +    | 852    | 835 | 89         | 98  | 10      | 11 | 44      | 30 | 85.7           | 14.3 | 17.1                        |
| WT            | -    | 642    | 627 | 262        | 247 | 27      | 26 | 123     | 97 | 61.9           | 38.1 | 4.7                         |
| WT            | D76A | 351    | 353 | 25         | 26  | 2       | 1  | 10      | 12 | 90.3           | 9.7  | 4.1                         |
| $\Delta recB$ | +    | 49     | 51  | 46         | 47  | 4       | 6  | 16      | 14 | 42.9           | 57.1 | 24                          |
| $\Delta recB$ | -    | 125    | 138 | 51         | 73  | 8       | 13 | 25      | 28 | 57.0           | 43.0 | 5.9                         |

**Table S3.** Total number of unique spacers acquired from the *E. coli* K12 genome, the *cas4* expression plasmid and corresponding empty vector control, the *cas1-2* expression plasmid and the minimalized type I-D array plasmid in different strains and either presence or absence of *cas4*. Strand orientation indicated with Forward (Fw) or Reverse (Rv). The two last columns represent the percentage of protospacers that match the genome (G) or plasmids (P) and spacers matching a protospacer with the GTN PAM.



### **Supplemental reference**

Heler, R., Samai, P., Modell, J.W., Weiner, C., Goldberg, G.W., Bikard, D., and Marraffini, L.A. (2015). Cas9 specifies functional viral targets during CRISPR-Cas adaptation. *Nature* 519, 199-202.
